1 TITLE:

2 Cross-population analysis of high-grade serous ovarian cancer reveals only two robust  
3 subtypes

4  
5 AUTHORS:

6 Gregory P. Way<sup>a,b,c</sup>, James Rudd<sup>a,d</sup>, Chen Wang<sup>e</sup>, Habib Hamidi<sup>f</sup>, Brooke L. Fridley<sup>g</sup>,  
7 Gottfried Konecny<sup>f</sup>, Ellen L. Goode<sup>e</sup>, Casey S. Greene<sup>a,b,h,1</sup>, Jennifer A. Doherty<sup>a,d,2</sup>

8  
9 AFFILIATIONS:

10 <sup>a</sup>Quantitative Biomedical Sciences, Geisel School of Medicine at Dartmouth College,  
11 Lebanon, NH; Norris Cotton Cancer Center, Geisel School of Medicine at Dartmouth  
12 College, Lebanon, NH

13 <sup>b</sup>Department of Systems Pharmacology and Translational Therapeutics, Perelman School  
14 of Medicine, University of Pennsylvania, Philadelphia, PA

15 <sup>c</sup>Genomics and Computational Biology Graduate Program, University of Pennsylvania,  
16 Philadelphia, PA 19103, USA

17 <sup>d</sup>Department of Epidemiology, Geisel School of Medicine at Dartmouth College,  
18 Lebanon, NH

19 <sup>e</sup>Department of Health Sciences Research, Mayo Clinic, Rochester, MN

20 <sup>f</sup>Department of Medicine, David Geffen School of Medicine, University of California,  
21 Los Angeles, CA

22 <sup>g</sup>Department of Biostatistics, University of Kansas Medical Center, Kansas City, KS

23 <sup>h</sup>Department of Genetics, Geisel School of Medicine at Dartmouth College, Lebanon, NH

24

25 CO-CORRESPONDING AUTHORS:

26 <sup>1</sup>10-131 SCTR 34<sup>th</sup> and Civic Center Blvd, Philadelphia, PA 19104; Phone: 215-573-  
27 2991; Fax: 215-573-9135; CSGreene@upenn.edu

28 <sup>2</sup>One Medical Center Drive, Lebanon, NH 03766; Phone: 603-653-9065; Fax: 603-653-  
29 9093; Jennifer.A.Doherty@Dartmouth.edu

30

31 CONFLICTS OF INTEREST:

32 The authors do not declare any conflicts of interest.

33

34 OTHER PRESENTATIONS:

35 Aspects of this study were presented at the 2015 AACR conference in Philadelphia.

36

37 RUNNING HEAD:

38 *Two ovarian cancer subtypes are similar across populations*

39

40 KEYWORDS:

41 Ovarian Cancer; Molecular Subtypes; Unsupervised Clustering

42

43 NOTES:

44 Words: 2,916; Figures: 4; Tables 4; Sup. Figures: 3; Sup. Tables: 6; Sup. Methods

45

46

47

48

49 **ABSTRACT:**

50 **Background**

51 Three to four gene expression-based subtypes of high-grade serous ovarian cancer (HGSC) have  
52 been previously reported. We sought to systematically determine the similarity of HGSC  
53 subtypes between populations.

54 **Methods**

55 We independently clustered ( $k = 3$  and  $k = 4$ ) five publicly-available HGSC mRNA expression  
56 datasets with  $>130$  tumors using  $k$ -means and non-negative matrix factorization. Within each  
57 population, we summarized differential expression patterns for each cluster as moderated  $t$   
58 statistic vectors using Significance Analysis of Microarrays. We calculated Pearson's  
59 correlations of these vectors to determine similarities and differences in expression patterns  
60 between clusters. We defined syn-clusters (SC) as sets of clusters that were strongly correlated  
61 across populations, and associated their expression patterns with biological pathways using  
62 geneset overrepresentation analyses.

63 **Results**

64 Across populations, for  $k = 3$ , moderated  $t$  score correlations for clusters 1, 2 and 3, respectively,  
65 ranged between 0.77-0.85, 0.80-0.90, and 0.65-0.77. For  $k = 4$ , correlations for clusters 1-4,  
66 respectively, ranged between 0.77-0.85, 0.83-0.89, 0.51-0.76, and 0.61-0.75. Within populations,  
67 comparing analogous clusters ( $k = 3$  versus  $k = 4$ ), correlations were high for clusters 1 and 2  
68 (0.91-1.00), but were lower for cluster 3 (0.22-0.80). Results are similar using non-negative  
69 matrix factorization. SC1 corresponds to previously-reported mesenchymal-like, SC2 to  
70 proliferative-like, SC3 to immunoreactive-like, and SC4 to differentiated-like subtypes.

71 **Conclusions**

72 The mesenchymal-like and proliferative-like subtypes are remarkably consistent across  
73 populations and could be uniquely targeted for treatment. The other two previously described  
74 subtypes are considerably less robust, and since cross-population comparison reveals that  $k = 3$   
75 and  $k = 4$  are both consistent with our results, they may not represent clear subtypes.

76

## 77 INTRODUCTION:

78 Ovarian cancer is a heterogeneous disease typically diagnosed at a late stage, with high  
79 mortality (1). The most aggressive and common histologic type is high-grade serous (HGSC) (2),  
80 characterized by extensive copy number variation, methylation events, and mutations (3). Given  
81 the genomic complexity of these tumors, mRNA expression can be thought of as a summary  
82 measure of these genomic and epigenetic alterations, to the extent that the alterations influence  
83 gene expression. Efforts to use whole genome mRNA expression analyses to stratify HGSC into  
84 clinically relevant subtypes have yielded potentially promising results, with all studies to date  
85 observing three to four subtypes with varying components of mesenchymal, proliferative,  
86 immunoreactive, and differentiated gene expression signatures (3–6), and some studies observing  
87 survival differences across subtypes (4,5). Tothill *et al.* first identified four HGSC subtypes (as  
88 well as two other non-HGSC subtypes) in an Australian population using  $k$ -means clustering.  
89 The authors labeled the subtypes as C1-C6, and observed that women with the C1 subtype, with  
90 a stromal-like gene signature, experienced the poorest survival compared to the other subtypes  
91 (4). Later, in The Cancer Genome Atlas (TCGA), an assemblage of tumors from various  
92 institutions throughout The United States, non-negative matrix factorization (NMF) clustering  
93 confirmed the identification of four subtypes which they labeled as mesenchymal, differentiated,  
94 proliferative, and immunoreactive, but there were no observed differences in survival (3). The  
95 TCGA group also applied NMF clustering to the Tothill data, and noted that analogous subtypes

96 had similar significantly differentially expressed genes (3). Konecny *et al.* also used NMF  
97 clustering in HGSC samples from the Mayo Clinic and identified four subtypes labeled as C1-C4  
98 (5). While these subtypes are similar to those described by TCGA, the Konecny *et al.* refined  
99 classifier was better able to differentiate survival between groups in their own data, and in data  
100 from TCGA and Bonome *et al.* (6). In the Konecny *et al.* population, as similarly observed in  
101 Tothill *et al.*, the mesenchymal-like (described as stromal-like in Tothill *et al.*) and proliferative-  
102 like subtypes had poor survival, and the immunoreactive-like subtype had favorable survival (5).

103         While results from these studies are relatively consistent, in more recent TCGA analyses  
104 by the Broad Institute Genome Data Analysis Center (GDAC) Firehose initiative with the largest  
105 number of HGSC cases evaluated to date, three subtypes fit the data better than did four (7,8).  
106 Also, in the original analysis of the TCGA data, over 80% of the samples were assigned to more  
107 than one subtype (9), as were 42% of the Mayo samples. In both TCGA and Tothill *et al.*, ~8-  
108 15% of samples were not able to be classified. Therefore, because of this large degree of  
109 uncertainty in HGSC subtyping, further characterization of subtypes is essential in order to  
110 determine etiologic factors and to develop targeted treatments.

111         We characterize the underlying patterns of gene expression for three and four HGSC  
112 subtypes through a unified bioinformatics pipeline in five independent populations, and assess  
113 the robustness of subtypes across these populations. Instead of identifying subtypes in a single  
114 population and applying a classification algorithm to identify the same subtypes in other  
115 populations, we use unsupervised clustering (performed using both *k*-means clustering and  
116 NMF) separately in each population to systematically identify HGSC subtypes. We summarize  
117 the expression patterns of over 10,000 genes for each identified subtype and comprehensively  
118 characterize correlations between subtype-specific gene expression both within and between

119 populations. We identify a set of clusters characterized by similar differentially expressed genes  
120 that are correlated across populations, which we term “syn-clusters” (SC).

121

## 122 METHODS:

### 123 *Data Inclusion*

124 We applied inclusion criteria as described in the supplementary materials using data from  
125 the R package, curatedOvarianData (10; Table S1) and a separate dataset (“Mayo”; 5). We  
126 deposited the Mayo high-grade serous samples as well as other samples with mixed histologies  
127 and grades, for a total of 528 additional ovarian tumor samples, in NCBI’s Gene Expression  
128 Omnibus (GEO; 11). The data can be accessed with the accession number GSE74357  
129 (<http://www.ncbi.nlm.nih.gov/geo/query/acc.cgi?acc=GSE74357>). All tumor samples uploaded  
130 were collected with approval by an institutional review board and by the U.S. Department of  
131 Health and Human Services. After applying the unified inclusion criteria pipeline, our final  
132 analytic datasets include: TCGA (n = 499; 3,7,8); Mayo (n = 379; GSE74357; 5); Yoshihara (n =  
133 256; GSE32062.GPL6480; (12); Tohill (n = 241; GSE9891; 4); and Bonome (n = 185;  
134 GSE26712; 7; Table 1). We restricted to the 10,930 genes measured in all 5 populations (Fig.  
135 S1). Code to replicate all analyses can be downloaded from  
136 [https://github.com/greenelab/hgsc\\_subtypes](https://github.com/greenelab/hgsc_subtypes).

137

### 138 *Clustering*

139 Because 3 or 4 subtypes had been reported previously, we focused on examining cluster  
140 assignment within and across populations for clusters identified using  $k = 3$  or  $k = 4$ . As detailed  
141 in the supplemental methods, we combined the 1,500 genes with the highest variance from each

142 population ( $n = 3,698$ ). We performed  $k$ -means clustering on these 3,698 genes in each  
143 population using the R package “cluster” (version 2.0.1; 13) with 20 initializations, and we  
144 characterized patterns of changes in sample assignment to clusters when  $k = 3$  versus  $k = 4$ . We  
145 further characterized clustering solutions within populations using sample-by-sample Pearson’s  
146 correlation matrices. We repeated our analyses using NMF in the R package “NMF” (version  
147 0.20.5; 14) with 100 initializations used for each  $k$ .

148

#### 149 *Identification of Syn-Clusters*

150 We performed a significance analysis of microarray (SAM) (15,16) analysis on all  
151 clusters from each population for  $k = 3$  and  $k = 4$  using all 10,930 genes. This resulted in a  
152 cluster-specific moderated  $t$  statistic for each of the input genes (17). To summarize the  
153 expression patterns of all 10,930 genes for a specific cluster in a specific population, we  
154 combined the moderated  $t$  statistics into a vector of length 10,930. To generate comparable labels  
155 across  $k = 3$  and  $k = 4$  analyses, the  $k = 3$  cluster which was most strongly correlated with a  $k = 4$   
156 cluster in the TCGA data was labeled “cluster 1” and the second strongest “cluster 2” etc.  
157 Clusters in other populations that were most strongly correlated with the TCGA clusters were  
158 assigned the same label. Clusters strongly correlated across populations form a syn-cluster (SC);  
159 i.e. the clusters from each population that are strongly correlated with each other and with TCGA  
160 “cluster 1” belong to SC1. We also compared our sample assignments to subtypes reported in the  
161 Tothill, TCGA, and Konecny publications.

162

#### 163 *Identifying Biological Processes Associated with Syn-Clusters*

164 To annotate the SCs with associated biological processes, we first identified the  
165 statistically significantly differentially expressed genes in the SAM list. We used a Bonferroni  
166 adjustment taking into account the total number of genes considered (10,930) resulting in a  $p$ -  
167 value cutoff of  $4.6 \times 10^{-6}$ . We used the intersection of these cluster-specific genesets across  
168 populations to create the final SC associated genesets. We then input these SC associated  
169 genesets into a PANTHER analysis (18) to determine SC-specific overrepresented biological  
170 pathways (Supplementary Materials).

171

## 172 RESULTS:

### 173 *Sample Cluster Assignment*

174 To visually inspect the consistency and distinctness of the clusters, we compared sample-  
175 by-sample correlation heatmaps (Fig. 1). For both  $k$  values and in each population, we observed  
176 high sample-by-sample correlations within clusters and relatively low sample-by-sample  
177 correlations across clusters (Fig. 1). The clusters in the Bonome population are depicted in gray  
178 scale because, in cross-population analyses to identify SCs, their expression patterns did not  
179 correlate with the clusters observed consistently in the four other populations (Table 2).

180 To better understand the changes in cluster assignment for  $k = 3$  versus  $k = 4$ , we  
181 compared the number of samples belonging to each cluster by  $k$  within each population  
182 (excluding Bonome; Fig. 2). Overall, the cross- $k$  pattern was consistent across populations.  
183 Cluster 1 contained essentially the same samples for both  $k = 3$  and  $k = 4$ , as did cluster 2, but  
184 samples from cluster 3 when  $k = 3$  tended to be split between clusters 3 and 4 when  $k = 4$ .  
185 Additionally, cluster 3 in  $k = 4$  tended to have varying numbers of samples from cluster 1 in  $k =$   
186 3, and cluster 4 in  $k = 4$  tended to include some samples from cluster 2 in  $k = 3$  (Fig. 2).



187

188 *Correlation of Cluster-Specific Expression Patterns*

189         Within populations, we observed very high Pearson correlations of moderated  $t$  score  
190 vectors between clusters across  $k = 3$  and  $k = 4$  (Table 2). We observed strong positive  
191 correlations of moderated  $t$  score vectors between analogous clusters across TCGA, Tothill,  
192 Mayo, and Yoshihara cluster assignments (Fig. 3; Table 3). However, while the clusters across  $k$   
193  $= 3$  and  $k = 4$  were correlated within the Bonome data, they did not correlate strongly with  
194 clusters identified in the other populations (Table 3). Because the correlations are so low  
195 compared to those observed in all four other populations, the Bonome data are not included in  
196 subsequent analyses. Across populations, positive correlations between clusters belonging to the  
197 same SC, and negative correlations between clusters in different SCs, were stronger for clusters  
198 identified when  $k = 3$  than when  $k = 4$  (Figure 3). We observed strong positive correlations for  
199 both SC1 and SC2 across populations, and strong negative correlations between SC1 and SC2.  
200 Weaker and more variable positive correlations were observed for SC3 and SC4 across  
201 populations. For  $k = 4$ , Yoshihara cluster 3 appears to be correlated to both clusters 3 and 4 in the  
202 other populations, and cluster 4 to be additionally weakly correlated to cluster 2 in the other  
203 populations.

204         Within each population, clusters identified by NMF were very similar to those identified  
205 using  $k$ -means clustering (Fig. 4). Again, both positive and negative correlations are stronger for  
206  $k = 3$  than for  $k = 4$ . Across  $k = 3$  and  $k = 4$ , correlations are strongest for clusters 1 and 2.  
207 Sample cluster assignments for both  $k$ -means and NMF clusters are provided in Table S2.

208

209 *Comparison with previously-identified HGSC clusters*

210 Our clustering results for the Tothill, TCGA, and Mayo datasets are highly concordant  
211 with the clustering described in the original publications (3–5), as evidenced by the high degree  
212 of overlap in sample assignments to the previously-defined clusters (Table 4). Our SC1 for both  
213 *k*-means analyses was mapped to the “Mesenchymal” label from TCGA, “C1” from Tothill, and  
214 mostly to “C4” from Mayo. SC1 was the most stable in our analysis within all datasets, across *k*  
215 = 3 and *k* = 4, and across clustering algorithms. SC2 was most similar to the “Proliferative” label  
216 from TCGA, “C5” from Tothill, and “C3” from Mayo. This was the second most stable SC. SC3  
217 for *k* = 3 was associated with both the “Immunoreactive” and “Differentiated” TCGA labels,  
218 “C2” and “C4” in Tothill, and “C1” and “C2” in Mayo. When setting *k*-means to find four  
219 clusters, SC3 was associated with “Immunoreactive”, “C2”, and “C1” while SC4 was associated  
220 with “Differentiated”, “C4”, and “C2” for TCGA, Tothill, and Mayo respectively. Pathway  
221 analysis results for all SCs are summarized in more detail in the supplementary materials and are  
222 presented in supplementary table S5.

223

## 224 DISCUSSION:

225 Previous studies have identified three to four subtypes of HGSC, but it is difficult to  
226 compare the results because each study performed analyses with different sample inclusion  
227 criteria, different gene expression platforms, and different statistical methods. In contrast, we  
228 used uniform sample inclusion criteria and applied *k*-means clustering and NMF through a  
229 standardized pipeline to five distinct publicly-available HGSC datasets including American,  
230 Australian, and Japanese women. To identify the HGSC clusters, we included only the 1,500  
231 most variable genes in each population, as was done in TCGA analyses. However, we used the  
232 combined set of most variable genes across the five populations to perform clustering, to ensure

233 that important genes, which may not have met the threshold in one population but did in others,  
234 were still considered. For each cluster in each population, we summarized the differential  
235 expression of 10,930 genes, and compared these cluster-specific gene expression patterns both  
236 within and between populations to determine which genes in a specific cluster were over- or  
237 under-expressed. This process allowed us to identify syn-clusters (SC) as groups of analogous  
238 clusters observed across populations. Despite considerable diversity in the populations studied  
239 and the assay platforms used, in four of the five populations studied, we identified two very  
240 distinct SCs (SC1 and SC2), and a third SC (SC3) and potentially fourth SC (SC4) that are much  
241 less robust across populations. The results were also similar using two distinct unsupervised  
242 clustering algorithms in all populations, which further validate the presence of robust gene  
243 expression based subtypes. Compared to the clusters reported in TCGA, Tothill, and Konecny,  
244 SC1 was most similar to the mesenchymal/C1/C4 subtype and SC2 was most similar to the  
245 proliferative/C5/C3 subtype, respectively. While concordance between the original Tothill and  
246 TCGA subtypes was reported in the TCGA HGSC publication (3), our analysis included an  
247 additional 59 TCGA samples. As well, we included an additional 210 samples from Mayo that  
248 were not analyzed in the original Konecny *et al.* publication (5).

249 While the groupings of samples from these data-driven, agnostic analyses are quite  
250 similar to those previously reported, we did not observe any strong patterns in survival  
251 differences across the subtypes that we identified (see Supplementary Material). However, we  
252 would not necessarily expect to find differences in survival unless the biologic characteristics of  
253 the tumor subtypes translate into different responses to standard treatments. Instead, our goal is  
254 to identify robust subtypes so that they can be exhaustively characterized and targeted treatments  
255 can be developed. That SC1 and SC2 were found regardless of the number of clusters specified,

256 and global expression patterns were so similar in separate distinct populations, increases our  
257 confidence that each of these clusters represents a set of reproducible biological signals. As well,  
258 the strong positive correlations within and between populations indicate homogeneity of gene  
259 expression patterns across populations for SC1 and SC2. The strong negative correlations  
260 between SC1 and SC2 also indicate that they are clearly distinct from one another; this is  
261 emphasized by the inverse direction of expression for the immune system process genes. For  
262 SC3 and SC4, both positive and negative correlations are less strong, and there is some positive  
263 correlation between the two clusters, particularly in the Japanese population.

264       The consistency of SC1 and SC2 across  $k$  parameters and between diverse populations is  
265 remarkable for a number of reasons. While these studies represent the largest collections of  
266 HGSC tumors to date, given the difficulties in collecting fresh frozen tissue for large-scale gene  
267 expression studies, it is unclear how accurately any of these data sets reflect the underlying  
268 population distribution of HGSC subtypes. Results from gene expression/RNA sequencing  
269 assays in large, population-based formalin-fixed paraffin-embedded (FFPE) tumor collections  
270 will be important in further informing the definitions of HGSC subtypes. As well, given the  
271 intra-tumor heterogeneity that is likely to exist (20), our approach would be strengthened by  
272 having data on multiple areas of the tumors. Finally, since histology and grade classification  
273 have changed over time (21,22), it is unclear whether the populations we studied used  
274 comparable guidelines to determine histology and grade. We attempted to exclude all low grade  
275 serous and endometrioid samples because they often have very different gene expression patterns  
276 and more favorable survival compared to their higher grade counterparts (2). While the Bonome  
277 publication specified that they included only high-grade tumors, grade is not included in the  
278 Bonome GSE26712 data set, so we were unable to determine whether the grade distribution

279 differs from the other studies (7). At any rate, it is unclear why the Bonome clusters, while  
280 internally consistent across  $k$ , did not correspond to the clusters observed in other populations. If  
281 samples are misclassified with respect to grade or other characteristics, depending on the extent  
282 of the misclassification, lower correlations and consequently difficulty assigning SCs could  
283 result.

284         Our study demonstrates that two SCs of HGSC, “mesenchymal-like” and “proliferative-  
285 like”, are clearly identified within and between populations. This suggests the presence of at least  
286 two robust HGSC subtypes that are either etiologically distinct, or acquire phenotypically  
287 determinant alterations through their development. These two SCs have different sets of  
288 significantly enriched pathways, which indicate distinct processes regulating and promoting  
289 tumorigenesis. The “mesenchymal-like” subtype includes aberrant regulated genes involved with  
290 extracellular matrix and cell to cell adhesion processes, while the “proliferative-like” subtype  
291 includes down-regulated immune-related genes, consistent with previous studies which have  
292 identified a negative immune signature in this subtype (5). The results also suggest that one or  
293 more additional subtypes, “immunoreactive-like” and “differentiated-like”, exist but are more  
294 variable across populations or may represent, for example, steps along an immunoreactive  
295 continuum. Data on copy number alterations, mutation burden, or epigenetic effects may capture  
296 more of these clusters’ variability. Because the “mesenchymal-like” and “proliferative-like”  
297 subtypes are consistently observed within and between populations, these subtypes are the best  
298 candidates for further characterization and development of subtype-specific treatment strategies.  
299 Future studies are needed to better sub-classify tumors that do not belong to either of these  
300 subtypes.

301

302 ACKNOWLEDGEMENTS:

303 We would like to thank Sebastian Armasu for help with statistical analyses and data  
304 processing and Emily Kate Shea for helpful discussions.

305

306 FUNDING:

307 This work was supported by the Institute for Quantitative Biomedical Sciences; the  
308 Norris Cotton Cancer Center Developmental Funds; the National Cancer Institute at the National  
309 Institutes of Health (R01 CA168758 to J.A.D., F31 CA186625 to J.R., R01 CA122443 to  
310 E.L.G.); the Mayo Clinic Ovarian Cancer SPORE (P50 CA136393 to E.L.G.); the Mayo Clinic  
311 Comprehensive Cancer Center-Gene Analysis Shared Resource (P30 CA15083); the Gordon and  
312 Betty Moore Foundation's Data-Driven Discovery Initiative (grant number GBMF 4552 to  
313 C.S.G.); and the American Cancer Society (grant number IRG 8200327 to C.S.G.).

314

315 FIGURE LEGENDS:

316 **Figure 1.** Sample by sample Pearson correlation matrices. Top panel:  $k = 3$ . Bottom panel:  $k = 4$ .  
317 The color bars are coded as blue, syn-cluster 1 (SC1); red, SC2; green, SC3; and purple, SC4. In  
318 the matrices, red represents high correlation, blue low correlation, and white intermediate  
319 correlation. The scales are slightly different in each population because of different correlational  
320 structures. The grey Bonome clusters indicate clusters not correlating well with any cluster from  
321 the other populations.

322

323 **Figure 2.** Sample membership distribution changes when setting  $k$  means to find  $k = 3$  and  $k = 4$ .

324 The bars represent sample cluster membership with  $k = 4$  and the colors indicate the same

325 samples' cluster assignments for when  $k = 3$ .

326

327 **Figure 3.** SAM moderated  $t$  score Pearson correlations. The color bars are coded as blue, syn-

328 cluster 1 (SC1); red, SC2; green, SC3; and purple, SC4. (A) Correlations across datasets for  $k$

329 means  $k = 3$ . (B) Correlations across datasets for  $k$  means  $k = 4$ . The matrices are symmetrical

330 and the upper triangle holds scatter plots for each comparison where each point represents one of

331 the 10,930 genes measured in each population.

332

333 **Figure 4.** SAM moderated  $t$  score Pearson correlations of clusters formed by  $k$  means clustering

334 and NMF clustering. Results are shown for both methods when setting each algorithm to find 3

335 and 4 clusters. The color bars are coded as blue, syn-cluster 1 (SC1); red, SC2; green, SC3; and

336 purple, SC4.

337

338 **Supplementary Figure S1.** Overlapping genes assayed using either the HG-U1133 Affymetrix

339 platform (TCGA, Tothill, Bonome) or the Agilent 4x44K platform (Mayo, Yoshihara).

340 Differences across datasets arise from inherent array differences and/or differences in quality

341 control preprocessing.

342

343 **Supplementary Figure S2.** NMF consensus matrices for datasets when (A)  $k = 3$  and (B)  $k = 4$ .

344 The first track represents cluster membership for  $k$  means clusters and the second track

345 represents silhouette widths. Note however that the NMF clusters are not mapped to the ordered  
346  $k$  means clusters.

347

348 **Supplementary Figure S3.** Kaplan-Meier survival curves. For each population, the top plot is  
349 for  $k = 3$  and the bottom plot is for  $k = 4$ .

350

351 REFERENCES:

- 352 1. Kurman RJ, Shih I-M. The Origin and Pathogenesis of Epithelial Ovarian Cancer: A  
353 Proposed Unifying Theory: *Am J Surg Pathol.* 2010;34:433–43.
- 354 2. Vang R, Shih I-M, Kurman RJ. Ovarian Low-grade and High-grade Serous Carcinoma:  
355 Pathogenesis, Clinicopathologic and Molecular Biologic Features, and Diagnostic Problems.  
356 *Adv Anat Pathol.* 2009;16:267–82.
- 357 3. The Cancer Genome Atlas. Integrated genomic analyses of ovarian carcinoma. *Nature.*  
358 2011;474:609–15.
- 359 4. Tothill RW, Tinker AV, George J, Brown R, Fox SB, Lade S, et al. Novel Molecular  
360 Subtypes of Serous and Endometrioid Ovarian Cancer Linked to Clinical Outcome. *Clin*  
361 *Cancer Res.* 2008;14:5198–208.
- 362 5. Konecny GE, Wang C, Hamidi H, Winterhoff B, Kalli KR, Dering J, et al. Prognostic and  
363 Therapeutic Relevance of Molecular Subtypes in High-Grade Serous Ovarian Cancer. *JNCI J*  
364 *Natl Cancer Inst.* 2014;106.
- 365 6. Bonome T, Levine DA, Shih J, Randonovich M, Pise-Masison CA, Bogomolny F, et al. A  
366 gene signature predicting for survival in suboptimally debulked patients with ovarian cancer.  
367 *Cancer Res.* 2008;68:5478–86.
- 368 7. Broad Institute TCGA Genome Data Analysis Center. Analysis Overview for Ovarian  
369 Serous Cystadenocarcinoma (Primary solid tumor cohort) - 02 April 2015. 2015.  
370 doi:10.7908/C1SQ8ZFW.
- 371 8. Broad Institute TCGA Genome Data Analysis Center. Clustering of mRNA expression:  
372 consensus NMF. 2015. doi:10.7908/C1BR8R71
- 373 9. Verhaak RGW, Tamayo P, Yang J-Y, Hubbard D, Zhang H, Creighton CJ, et al.  
374 Prognostically relevant gene signatures of high-grade serous ovarian carcinoma. *J Clin*  
375 *Invest.* 2012.



- 376 10. Ganzfried BF, Riester M, Haibe-Kains B, Risch T, Tyekucheveva S, Jazic I, et al.  
377 curatedOvarianData: clinically annotated data for the ovarian cancer transcriptome.  
378 Database. 2013.
- 379 11. Edgar R, Domrachev M, Lash AE. Gene Expression Omnibus: NCBI gene expression and  
380 hybridization array data repository. *Nucleic Acids Res.* 2002;30(1):207-210.
- 381 12. Yoshihara K, Tsunoda T, Shigemizu D, Fujiwara H, Hatae M, Fujiwara H, et al. High-Risk  
382 Ovarian Cancer Based on 126-Gene Expression Signature Is Uniquely Characterized by  
383 Downregulation of Antigen Presentation Pathway. *Clin Cancer Res.* 2012;18:1374–85.
- 384 13. Maechler M, Rousseeuw P, Struyf A, Hubert M, Hornik K. cluster: Cluster Analysis Basics  
385 and Extensions. 2014;R package version 1.15.3.
- 386 14. Brunet J-P, Tamayo P, Golub TR, Mesirov JP. Metagenes and molecular pattern discovery  
387 using matrix factorization. *Proc Natl Acad Sci.* 2004;101:4164–9.
- 388 15. Tusher VG, Tibshirani R, Chu G. Significance analysis of microarrays applied to the  
389 ionizing radiation response. *Proc Natl Acad Sci.* 2001;98:5116–21.
- 390 16. Schwender H, Krause A, Ickstadt K. Identifying interesting genes with sigenes. *RNews.*  
391 2006;6:45–50.
- 392 17. Schwender H. siggenes: Multiple testing using SAM and Efron’s empirical Bayes  
393 approaches. 2012;R package version 1.40.0.
- 394 18. Mi H, Muruganujan A, Thomas PD. PANTHER in 2013: modeling the evolution of gene  
395 function, and other gene attributes, in the context of phylogenetic trees. *Nucleic Acids Res.*  
396 2013;41:D377–86.
- 397 19. Rousseeuw PJ. Silhouettes: A graphical aid to the interpretation and validation of cluster  
398 analysis. *J Comput Appl Math.* 1987;20:53-65.
- 399 20. Blagden SP. Harnessing Pandemonium: The Clinical Implications of Tumor Heterogeneity  
400 in Ovarian Cancer. *Front Oncol.* 2015;5.
- 401 21. Silverberg SG. Histopathologic grading of ovarian carcinoma: a review and proposal. *Int J*  
402 *Gynecol Pathol Off J Int Soc Gynecol Pathol.* 2000;19:7–15.
- 403 22. Soslow RA. Histologic Subtypes of Ovarian Carcinoma: An Overview. *Int J Gynecol Pathol*  
404 2008

405

406

407

408

409 **Table 1:** Characteristics of the populations included in the seven analytic data sets

|                                   | TCGA                   | Mayo          | Yoshihara <i>et al.</i> | Tothill <i>et al.</i> | Bonome <i>et al.</i> |
|-----------------------------------|------------------------|---------------|-------------------------|-----------------------|----------------------|
| GEO                               |                        | GSE74357      | GSE32062                | GSE9891               | GSE26712             |
| Platform                          | Affy HGU1133           | Agilent 4x44K | Agilent 4x44K           | Affy HGU1133          | Affy HGU1133         |
| Population                        | United States          | United States | Japan                   | Australia             | United States        |
| Original Sample Size              | 578                    | 528           | 260                     | 285                   | 195                  |
| Analytic Sample Size <sup>b</sup> | 499                    | 379           | 256                     | 242                   | 185                  |
| Age [Mean (SD)]                   | 60.0 (11.6)            | 62.9 (11.3)   | NA                      | 60.3 (10.3)           | 61.5 (11.9)          |
| Stage                             |                        |               |                         |                       |                      |
| I                                 | 10 (2%)                | 7 (3%)        | 0 (0%)                  | 11 (5%)               | 0 (0%)               |
| II                                | 17 (4%)                | 11 (3%)       | 0 (0%)                  | 8 (4%)                | 0 (0%)               |
| III                               | 351 (80%)              | 275 (73%)     | 202 (79%)               | 178 (83%)             | 146 (80%)            |
| IV                                | 63 (14%)               | 86 (23%)      | 54 (21%)                | 17 (8%)               | 36 (20%)             |
| Grade                             |                        |               |                         |                       |                      |
| 2                                 | 55 (12%)               | 3 (1%)        | 130 (51%)               | 80 (37%)              | NA                   |
| 3                                 | 386 (88%) <sup>a</sup> | 376 (99%)     | 126 (49%)               | 134 (63%)             | NA                   |
| Debulking                         |                        |               |                         |                       |                      |
| Optimal                           | 325 (74%)              | 287 (76%)     | 101 (39%)               | 132 (62%)             | 89 (49%)             |
| Suboptimal                        | 116 (26%)              | 87 (23%)      | 155 (61%)               | 82 (38%)              | 93 (51%)             |

410

411 NA: Data not reported

412 <sup>a</sup>One sample was labeled as 'Grade 4' in TCGA

413 <sup>b</sup>samples without full survival data were excluded in survival analyses

414 **Table 2:** SAM moderated t score vector Pearson correlations between clusters identified using  $k$   
 415 = 3 versus  $k = 4$  within each population.

|                         | Cluster 1 | Cluster 2 | Cluster 3 | Cluster 4 <sup>a</sup> |
|-------------------------|-----------|-----------|-----------|------------------------|
| TCGA                    | 0.99      | 0.98      | 0.69      | 0.53                   |
| Mayo                    | 0.91      | 0.97      | 0.48      | 0.67                   |
| Yoshihara <i>et al.</i> | 1.00      | 0.94      | 0.80      | 0.59                   |
| Tothill <i>et al.</i>   | 0.95      | 1.00      | 0.22      | 0.89                   |
| Bonome <i>et al.</i>    | 0.98      | 0.99      | 0.80      | 0.28                   |

416 <sup>a</sup>Correlations for cluster 3 ( $k = 3$ ) versus cluster 4 ( $k = 4$ ).

417

418 **Table 3:** SAM moderated t score vector Pearson correlations between analogous clusters across  
 419 populations<sup>a</sup>

|                  | Cluster 1   | Cluster 2    | Cluster 3   | Cluster 4   |
|------------------|-------------|--------------|-------------|-------------|
| $k = 3^a$        | 0.77 - 0.85 | 0.80 - 0.90  | 0.65 - 0.77 | NA          |
| $k = 4^a$        | 0.77 - 0.85 | 0.83 - 0.89  | 0.51 - 0.76 | 0.61 - 0.75 |
| Bonome $k = 3^b$ | 0.45 - 0.46 | -0.02 - 0.12 | 0.22 - 0.42 | NA          |
| Bonome $k = 4^b$ | 0.50 - 0.57 | -0.04 - 0.04 | 0.13 - 0.29 | 0.26 - 0.43 |

420 <sup>a</sup>Correlation ranges for TCGA, Mayo, Yoshihara, and Tothill.

421 <sup>b</sup>Bonome is removed from gene set analyses because of low correlating clusters.

422

423

424 **Table 4:** Distributions of sample membership in the clusters identified in our study by the  
 425 original cluster assignments in the TCGA, Tothill, and Konecny studies. Clusters identified in  
 426 our study using *k*-means clustering with  $k = 3$  and  $k = 4$

|           | TCGA |     |     |     |                 | Tothill <i>et al.</i> |    |    |    |    |    | Konecny <i>et al.</i> |    |    |    |    |                 |
|-----------|------|-----|-----|-----|-----------------|-----------------------|----|----|----|----|----|-----------------------|----|----|----|----|-----------------|
|           | Mes  | Pro | Imm | Dif | NC <sup>a</sup> | C1                    | C2 | C3 | C4 | C5 | C6 | NC <sup>a</sup>       | C1 | C2 | C3 | C4 | NA <sup>b</sup> |
| Cluster 1 | 98   | 2   | 20  | 11  | 6               | 77                    | 22 | 0  | 0  | 0  | 0  | 6                     | 16 | 13 | 2  | 26 | 82              |
| Cluster 2 | 1    | 111 | 0   | 11  | 16              | 1                     | 0  | 0  | 3  | 35 | 2  | 5                     | 0  | 16 | 36 | 0  | 56              |
| Cluster 3 | 0    | 21  | 75  | 106 | 21              | 0                     | 22 | 6  | 41 | 0  | 0  | 22                    | 26 | 31 | 5  | 0  | 70              |
|           | Mes  | Pro | Imm | Dif | NC <sup>a</sup> | C1                    | C2 | C3 | C4 | C5 | C6 | NC <sup>a</sup>       | C1 | C2 | C3 | C4 | NA <sup>b</sup> |
| Cluster 1 | 97   | 4   | 12  | 12  | 5               | 74                    | 0  | 0  | 0  | 0  | 0  | 0                     | 7  | 12 | 3  | 25 | 62              |
| Cluster 2 | 1    | 85  | 0   | 0   | 13              | 1                     | 0  | 0  | 1  | 34 | 2  | 5                     | 0  | 9  | 31 | 0  | 41              |
| Cluster 3 | 0    | 5   | 80  | 3   | 12              | 3                     | 42 | 0  | 1  | 1  | 0  | 14                    | 29 | 6  | 0  | 1  | 57              |
| Cluster 4 | 1    | 40  | 3   | 113 | 13              | 0                     | 2  | 6  | 42 | 0  | 0  | 14                    | 6  | 33 | 9  | 0  | 48              |

427 <sup>a</sup>NC = Samples not clustered in original publication

428 <sup>b</sup>NA = Samples not assessed at the time of the original publication

429 NOTE: The corresponding labels for the generally similar HGSC gene expression subtypes  
 430 observed in the TCGA, Tothill, and Konecny studies are, respectively: mesenchymal/C1/C4,  
 431 proliferative/C5/C3, immunoreactive/C2/C1, and differentiated/C4/C2)

$k = 3$

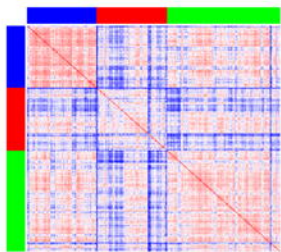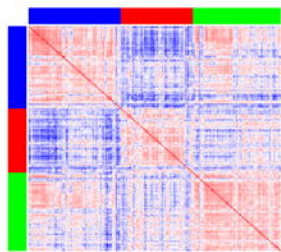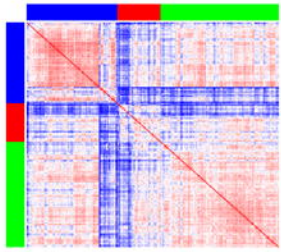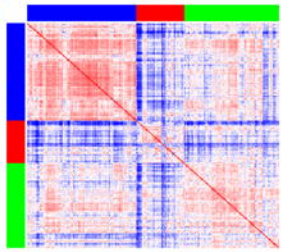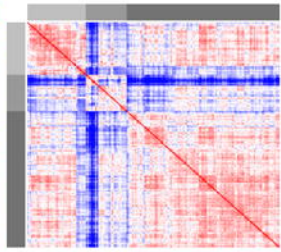

$k = 4$

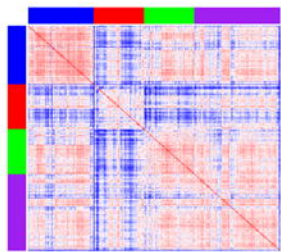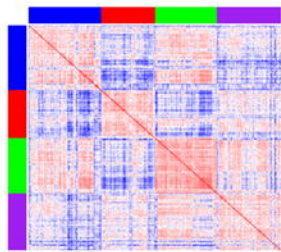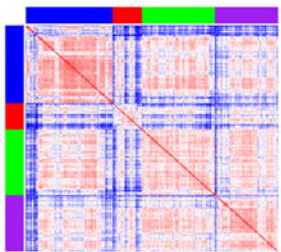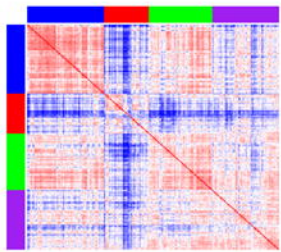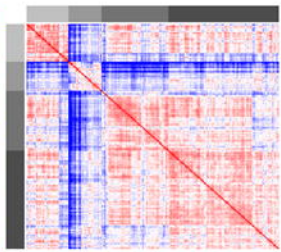

TCGA

Mayo

Yoshihara

Tothill

Bonome

# TCGA

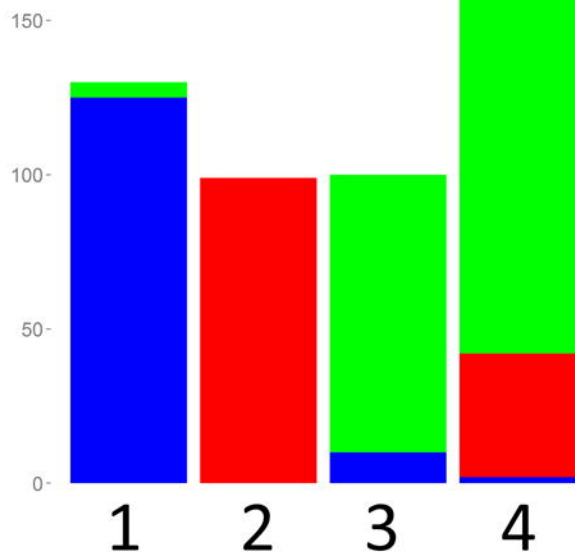

# Mayo

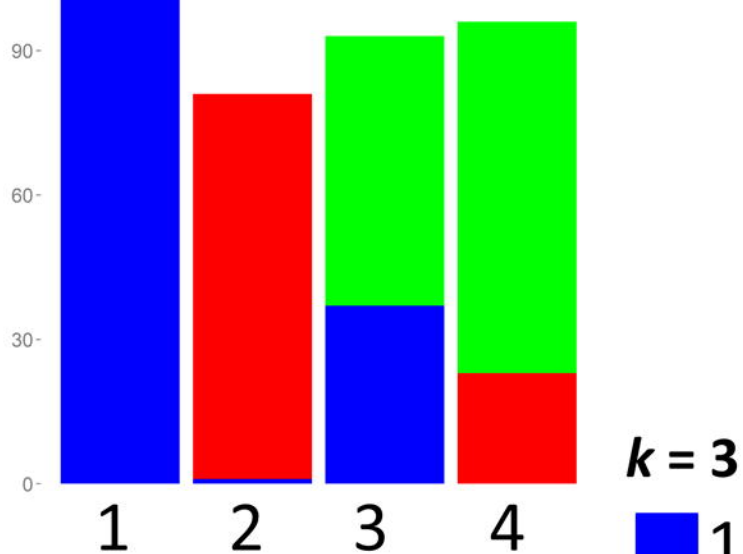

# Yoshihara

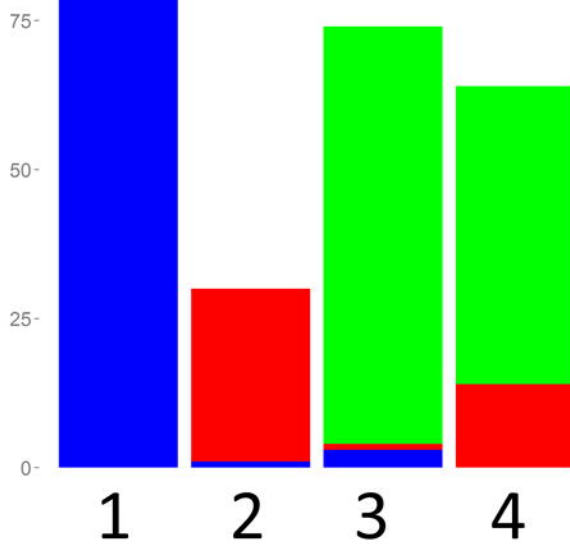

# Tothill

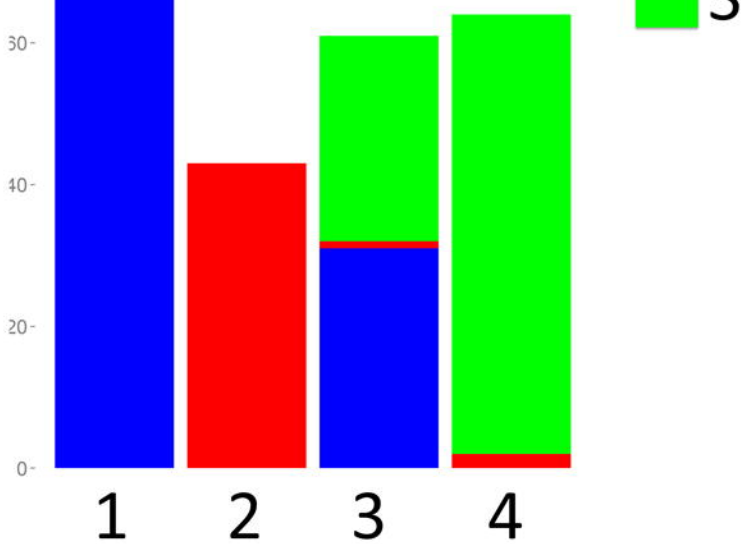

$k = 3$

1

2

3

A.

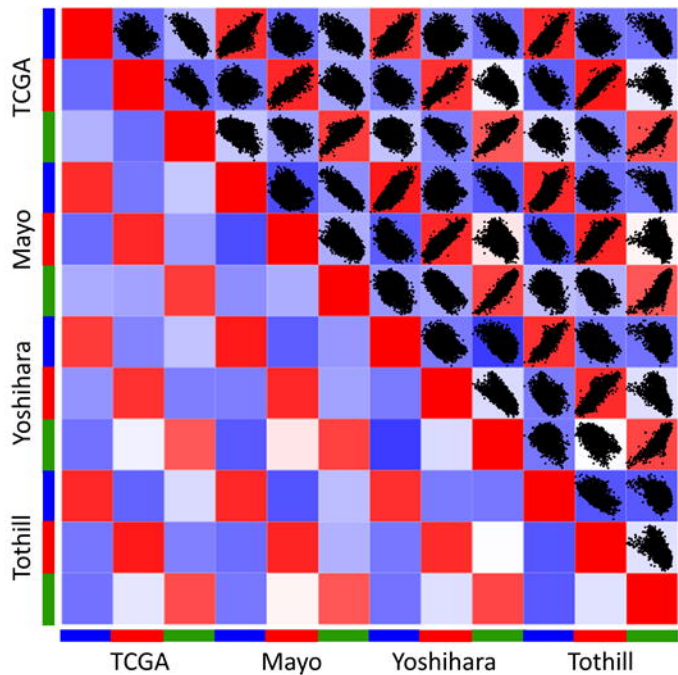

B.

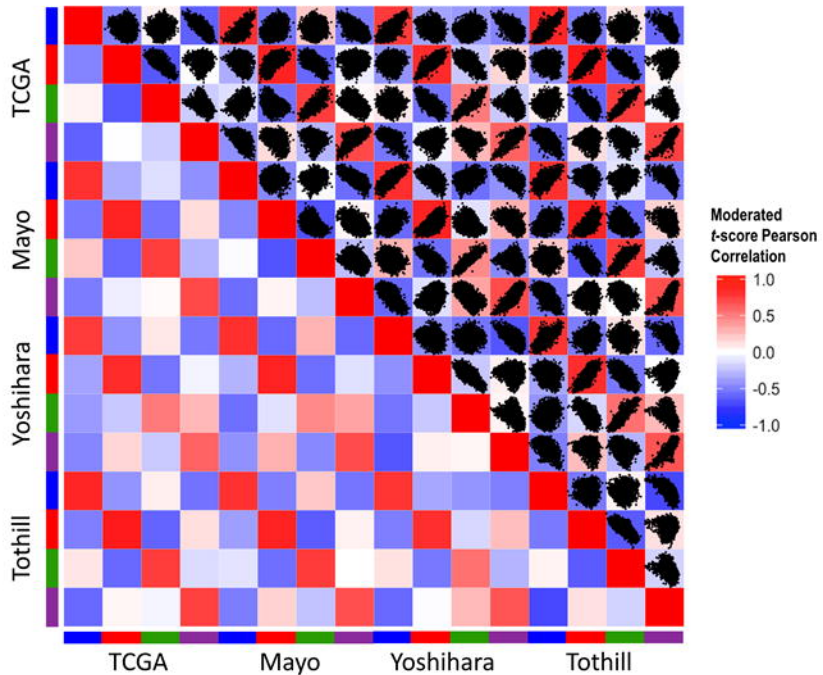

**TCGA**

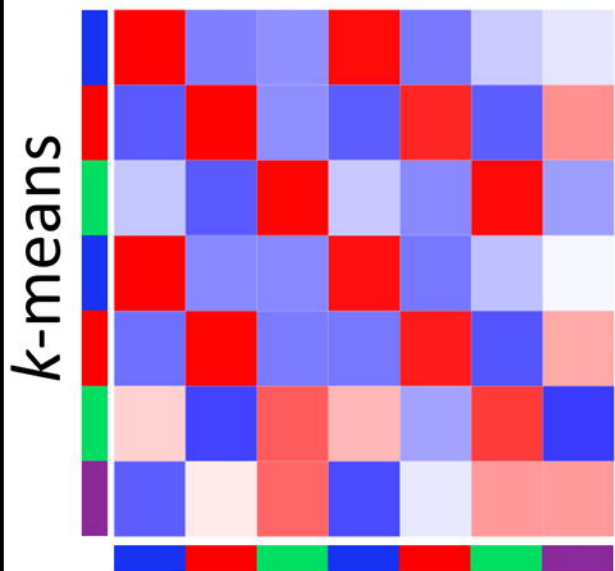

**Mayo**

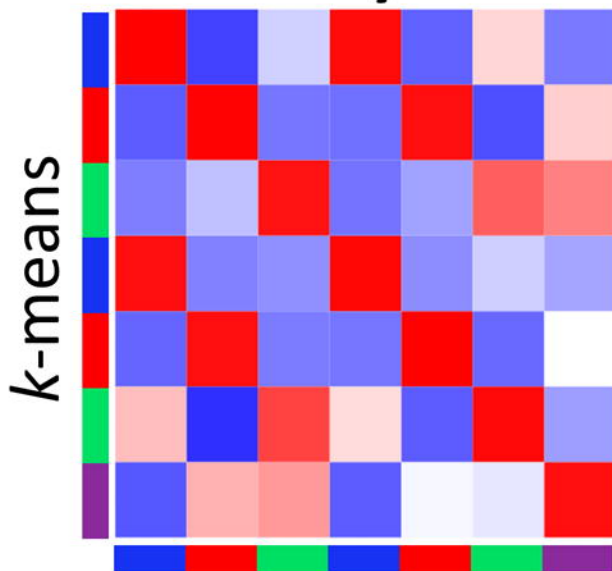

**NMF**

**Yoshihara**

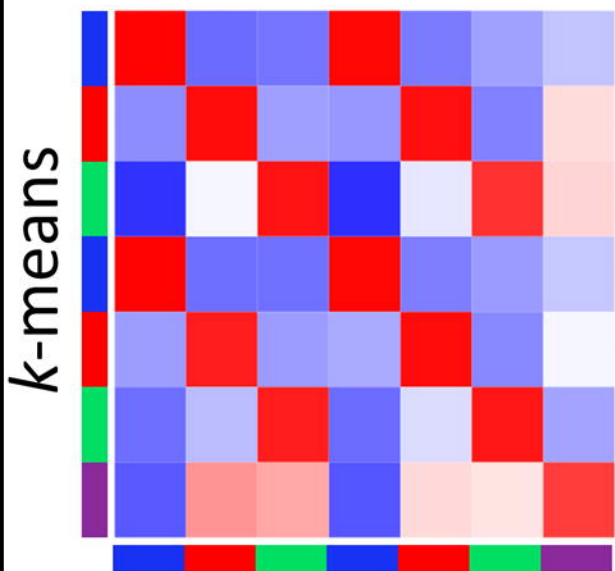

**NMF**

**Tothill**

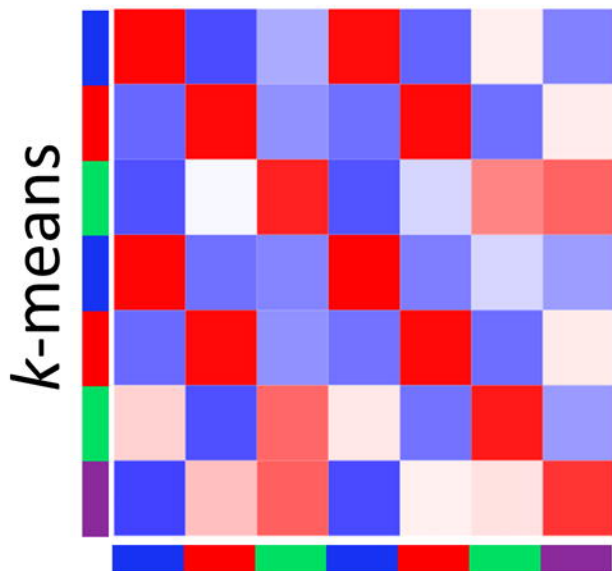

Moderated  
*t*-score Pearson  
Correlation

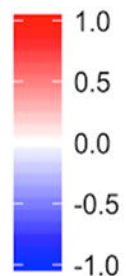

**NMF**

**NMF**





A.

TCGA

Mayo

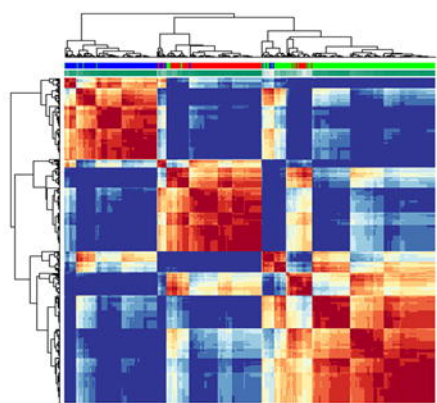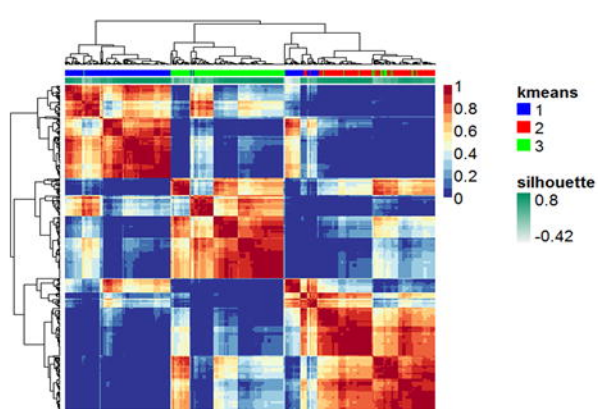

Yoshihara

Tothill

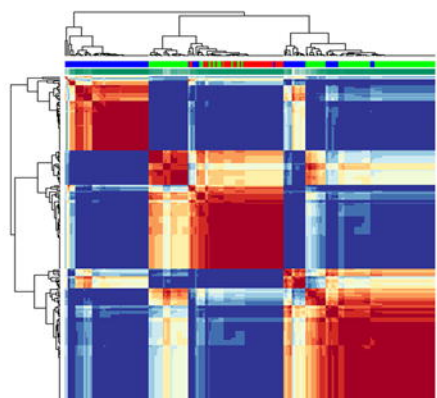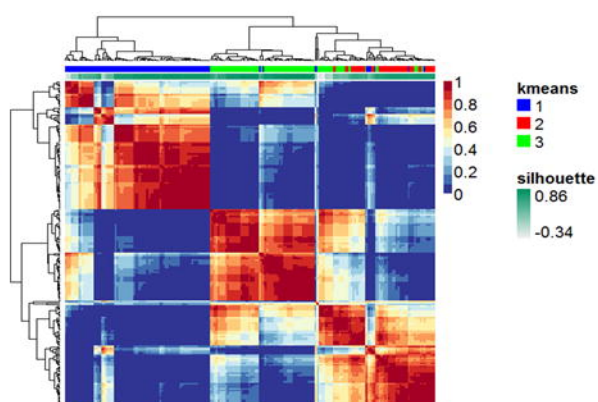

B.

TCGA

Mayo

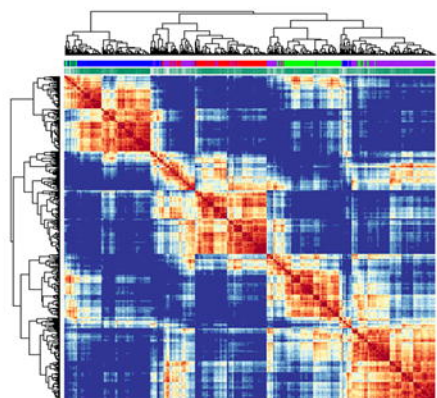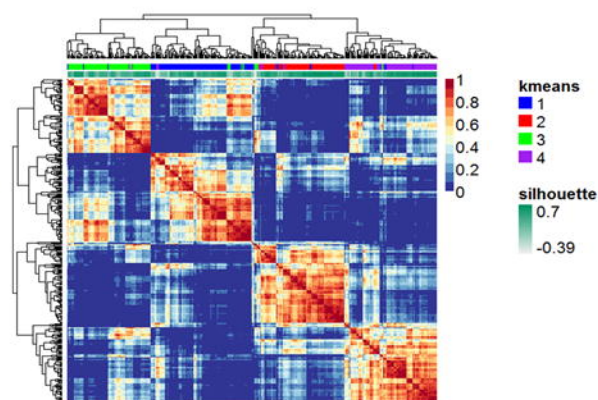

Yoshihara

Tothill

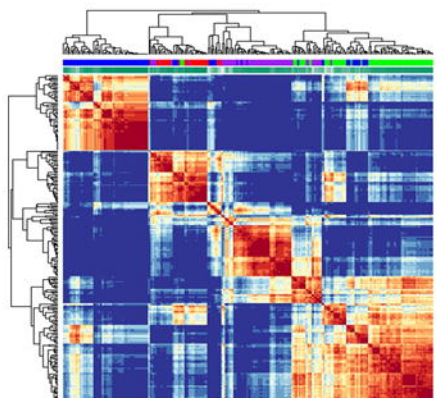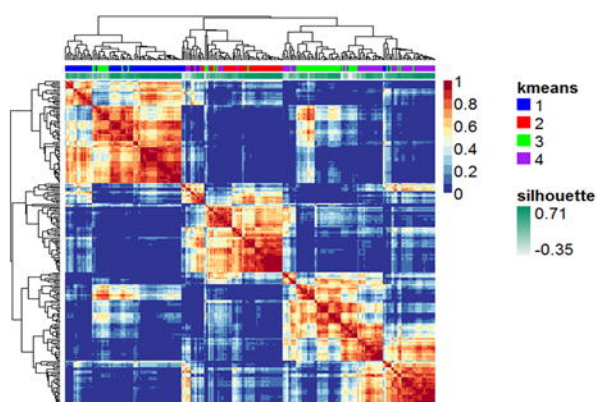

# TCGA

# Mayo

# Yoshihara

# Tothill

Cumulative Survival

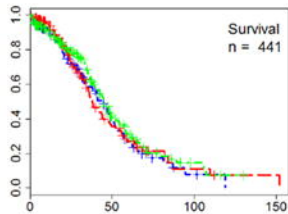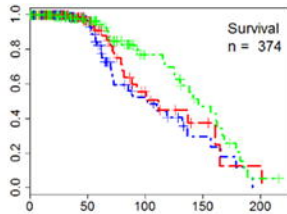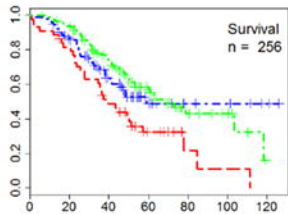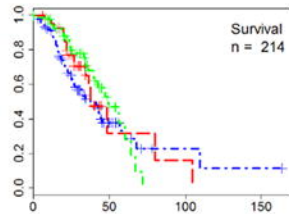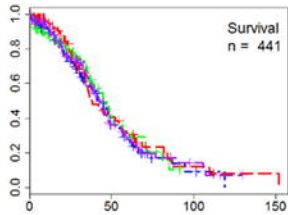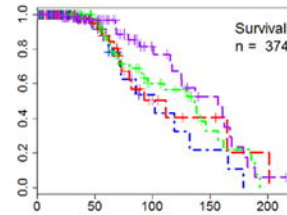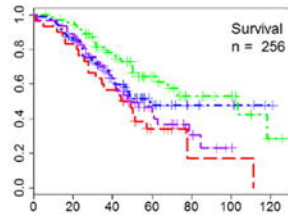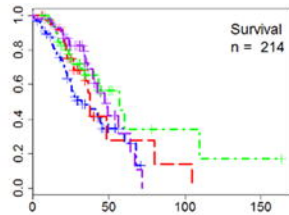

Months

## Clusters

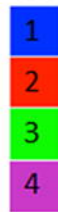

Source: http://biorxiv.org/content/10.1101/030239v1.full.pdf
